# Supplementary material for: An ethical visualization of the NorthCOVID-19 model
Source: PeerJ journal article supplement (doi:10.7717/peerj-cs.980), 2022-05-16
Supplement: NorthCOVID-19_Questionnaire.pdf [file NorthCOVID-19_Questionnaire.pdf]

## **PART 1**

1. I think that I would like to use the NorthCOVID-19 system frequently

Strongly Disagree                   Strongly Agree  
                                 1    2    3    4    5

2. I found the NorthCOVID-19 system unnecessarily complex

Strongly Disagree                   Strongly Agree  
                                 1    2    3    4    5

3. I thought the NorthCOVID-19 system was easy to use

Strongly Disagree                   Strongly Agree  
                                 1    2    3    4    5

4. I think that I would need the support of a technical person to be able to use the NorthCOVID-19 system

Strongly Disagree                   Strongly Agree  
                                 1    2    3    4    5

5. I found the various functions in the NorthCOVID-19 system were well integrated

Strongly Disagree                   Strongly Agree  
                                 1    2    3    4    5

6. I thought there was too much inconsistency in the NorthCOVID-19 system

Strongly Disagree                   Strongly Agree  
                                 1    2    3    4    5

7. I would imagine that most people would learn to use the NorthCOVID-19 system very quickly

Strongly Disagree                   Strongly Agree  
                                 1    2    3    4    5

8. I found the NorthCOVID-19 system very cumbersome to use

Strongly Disagree   0   0   0   0   0   Strongly Agree  
1   2   3   4   5

9. I felt very confident using the NorthCOVID-19 system

Strongly Disagree   0   0   0   0   0   Strongly Agree  
1   2   3   4   5

10. I needed to learn a lot of things before I could get going with the NorthCOVID-19 system

Strongly Disagree   0   0   0   0   0   Strongly Agree  
1   2   3   4   5

## **PART 2**

1. I feel confident in my understanding of the video output

Strongly Disagree   0   0   0   0   0   Strongly Agree  
1   2   3   4   5

2. In comparison to the video output, I found that the NorthCOVID-19 website output is easier to understand

Strongly Disagree   0   0   0   0   0   Strongly Agree  
1   2   3   4   5

3. In the video output, I found the audio that accompanied it to be helpful in understanding the results

Strongly Disagree   0   0   0   0   0   Strongly Agree  
1   2   3   4   5

4. I feel the visuals/graphs provided in the video improved the comprehension of the data

Strongly Disagree   0   0   0   0   0   Strongly Agree  
1   2   3   4   5

5. I feel the information provided in the video is enough for me to make an informed decision

Strongly Disagree                  Strongly Agree

1   2   3   4   5
